# Supplementary material for: Intracellular Information Processing through Encoding and Decoding of Dynamic Signaling Features
Source: PubMed Central journal article supplement (PMC4619640; doi:10.1371/journal.pcbi.1004563), 2015-10-22
Supplement: pcbi.1004563.s002.pdf [file pcbi.1004563.s002.pdf]

S2 Table: Details of positive feedback loop motif for JNK module.

| <i>Species</i>                                                                                                                                                                                                                                                                                                                                                                                                                                                                                                                                                                                                                                                                                                                                                                                                                                                                                                                                                                                                                                                                                                                                                                                                                                                                                                                                                                                                                                                                                                                                                                                                                                                                                                                                                                                                                                                                                          | <i>Equation</i>                                                                                                                                                                                                                                                                                                                       | <i>Ref.</i> |
|---------------------------------------------------------------------------------------------------------------------------------------------------------------------------------------------------------------------------------------------------------------------------------------------------------------------------------------------------------------------------------------------------------------------------------------------------------------------------------------------------------------------------------------------------------------------------------------------------------------------------------------------------------------------------------------------------------------------------------------------------------------------------------------------------------------------------------------------------------------------------------------------------------------------------------------------------------------------------------------------------------------------------------------------------------------------------------------------------------------------------------------------------------------------------------------------------------------------------------------------------------------------------------------------------------------------------------------------------------------------------------------------------------------------------------------------------------------------------------------------------------------------------------------------------------------------------------------------------------------------------------------------------------------------------------------------------------------------------------------------------------------------------------------------------------------------------------------------------------------------------------------------------------|---------------------------------------------------------------------------------------------------------------------------------------------------------------------------------------------------------------------------------------------------------------------------------------------------------------------------------------|-------------|
| ATF2                                                                                                                                                                                                                                                                                                                                                                                                                                                                                                                                                                                                                                                                                                                                                                                                                                                                                                                                                                                                                                                                                                                                                                                                                                                                                                                                                                                                                                                                                                                                                                                                                                                                                                                                                                                                                                                                                                    | $\dot{X}_1 = V_{y_1}^{x_1} \cdot f(Y_1, K_{y_1}^{x_1}) + V_{c_1}^{x_1, x_2} \cdot f(C_1, K_{c_1}^{x_1, x_2}) - k_{x_1}^{y_1} \cdot f(X_1, K_{x_1}^{y_1}) \cdot f_s^{\text{JNK}}$                                                                                                                                                      |             |
| pATF2                                                                                                                                                                                                                                                                                                                                                                                                                                                                                                                                                                                                                                                                                                                                                                                                                                                                                                                                                                                                                                                                                                                                                                                                                                                                                                                                                                                                                                                                                                                                                                                                                                                                                                                                                                                                                                                                                                   | $\dot{Y}_1 = k_{x_1}^{y_1} \cdot f(X_1, K_{x_1}^{y_1}) \cdot f_s^{\text{JNK}} + V_{z_1}^{y_1} \cdot f(Z_1, K_{z_1}^{y_1}) - V_{y_1}^{x_1} \cdot f(Y_1, K_{y_1}^{x_1}) - k_{y_1}^{z_1} \cdot f(Y_1, K_{y_1}^{z_1}) \cdot f_s^{\text{JNK}}$                                                                                             |             |
| ppATF2                                                                                                                                                                                                                                                                                                                                                                                                                                                                                                                                                                                                                                                                                                                                                                                                                                                                                                                                                                                                                                                                                                                                                                                                                                                                                                                                                                                                                                                                                                                                                                                                                                                                                                                                                                                                                                                                                                  | $\dot{Z}_1 = k_{y_1}^{z_1} \cdot f(Y_1, K_{y_1}^{z_1}) \cdot f_s^{\text{JNK}} - V_{z_1}^{y_1} \cdot f(Z_1, K_{z_1}^{y_1}) - k_{z_1, z_2}^{c_1} Z_2 Z_1 + k_{c_1}^{z_1 z_2} C_1$                                                                                                                                                       |             |
| ppATF2:ppc-JUN                                                                                                                                                                                                                                                                                                                                                                                                                                                                                                                                                                                                                                                                                                                                                                                                                                                                                                                                                                                                                                                                                                                                                                                                                                                                                                                                                                                                                                                                                                                                                                                                                                                                                                                                                                                                                                                                                          | $\dot{C}_1 = k_{z_1, z_2}^{c_1} Z_2 Z_1 - k_{c_1}^{z_1, z_2} C_1 - V_{c_1}^{x_1, x_2} \cdot f(C_1, K_{c_1}^{x_1, x_2}) - k_{c_1}^{x_2} X_2^{pr} C_1 + k_{c_2}^{c_1} C_2$                                                                                                                                                              |             |
| c-Jun <sub>pr</sub> :ppATF2:ppc-JUN                                                                                                                                                                                                                                                                                                                                                                                                                                                                                                                                                                                                                                                                                                                                                                                                                                                                                                                                                                                                                                                                                                                                                                                                                                                                                                                                                                                                                                                                                                                                                                                                                                                                                                                                                                                                                                                                     | $\dot{C}_2 = k_{c_1}^{c_2} X_2^{pr} C_1 - k_{c_2}^{c_1} C_2$                                                                                                                                                                                                                                                                          | [1]         |
| c-Jun <sub>pre</sub> -mRNA                                                                                                                                                                                                                                                                                                                                                                                                                                                                                                                                                                                                                                                                                                                                                                                                                                                                                                                                                                                                                                                                                                                                                                                                                                                                                                                                                                                                                                                                                                                                                                                                                                                                                                                                                                                                                                                                              | $\dot{X}_2^{pre\text{mRNA}} = R_0 + k_{c_2}^{pre\text{mRNA}} C_2 - \frac{V_c}{V_n} \cdot k_{pre\text{mRNA}}^{mRNA} X_2^{pre\text{mRNA}}$                                                                                                                                                                                              |             |
| c-Jun <sub>m</sub> mRNA                                                                                                                                                                                                                                                                                                                                                                                                                                                                                                                                                                                                                                                                                                                                                                                                                                                                                                                                                                                                                                                                                                                                                                                                                                                                                                                                                                                                                                                                                                                                                                                                                                                                                                                                                                                                                                                                                 | $\dot{X}_2^{mRNA} = \frac{V_n}{V_c} \cdot k_{pre\text{mRNA}}^{mRNA} X_2^{pre\text{mRNA}} - k_{mRNA}^\phi X_2^{mRNA}$                                                                                                                                                                                                                  |             |
| c-JUN <sub>p</sub>                                                                                                                                                                                                                                                                                                                                                                                                                                                                                                                                                                                                                                                                                                                                                                                                                                                                                                                                                                                                                                                                                                                                                                                                                                                                                                                                                                                                                                                                                                                                                                                                                                                                                                                                                                                                                                                                                      | $\dot{X}_2^p = k_{mRNA}^p X_2^{mRNA} - k_{cyt}^n X_2^p$                                                                                                                                                                                                                                                                               |             |
| c-JUN                                                                                                                                                                                                                                                                                                                                                                                                                                                                                                                                                                                                                                                                                                                                                                                                                                                                                                                                                                                                                                                                                                                                                                                                                                                                                                                                                                                                                                                                                                                                                                                                                                                                                                                                                                                                                                                                                                   | $\dot{X}_2 = \frac{V_n}{V_c} \cdot k_{cyt}^n X_2^p + V_{c_1}^{x_1, x_2} \cdot f(C_1, K_{c_1}^{x_1, x_2}) + V_D^{x_2, x_2^*} \cdot f(D, K_D^{x_2, x_2^*}) + 2 \cdot V_D^{x_2} \cdot f(D, K_D^{x_2}) + V_{y_2}^{x_2} \cdot f(Y_2, K_{y_2}^{x_2}) - k_{x_2}^{y_2} \cdot f(X_2, K_{y_2}^{x_2}) \cdot f_s^{\text{JNK}} - k_{x_2}^\phi X_2$ |             |
| pc-JUN                                                                                                                                                                                                                                                                                                                                                                                                                                                                                                                                                                                                                                                                                                                                                                                                                                                                                                                                                                                                                                                                                                                                                                                                                                                                                                                                                                                                                                                                                                                                                                                                                                                                                                                                                                                                                                                                                                  | $\dot{Y}_2 = k_{x_2}^{y_2} \cdot f(X_2, K_{y_2}^{x_2}) \cdot f_s^{\text{JNK}} + V_{z_2}^{y_2} \cdot f(Z_2, K_{z_2}^{y_2}) - k_{y_2}^{z_2} \cdot f(Z_2, K_{y_2}^{z_2}) \cdot f_s^{\text{JNK}} - V_{y_2}^{x_2} \cdot f(Y_2, K_{y_2}^{x_2}) - k_{y_2}^\phi Y_2$                                                                          |             |
| ppc-JUN                                                                                                                                                                                                                                                                                                                                                                                                                                                                                                                                                                                                                                                                                                                                                                                                                                                                                                                                                                                                                                                                                                                                                                                                                                                                                                                                                                                                                                                                                                                                                                                                                                                                                                                                                                                                                                                                                                 | $\dot{Z}_2 = k_{y_2}^{z_2} \cdot f(Y_2, K_{y_2}^{z_2}) \cdot f_s^{\text{JNK}} - V_{z_2}^{y_2} \cdot f(Z_2, K_{z_2}^{y_2}) - k_{z_2}^\phi Z_2 - k_{z_1, z_2}^{c_1} Z_2 Z_1 + k_{c_1}^{z_1, z_2} C_1 - 2 \cdot k_{z_2}^D Z_2 + 2 \cdot k_D^{z_2} D - k_{z_2, z_2^*}^{D^*} Z_2 Z_2^* + k_{D^*}^{z_2, z_2^*} D^*$                         |             |
| ppc-JUN:ppc-JUN                                                                                                                                                                                                                                                                                                                                                                                                                                                                                                                                                                                                                                                                                                                                                                                                                                                                                                                                                                                                                                                                                                                                                                                                                                                                                                                                                                                                                                                                                                                                                                                                                                                                                                                                                                                                                                                                                         | $\dot{D} = k_{z_2}^D Z_2 Z_2 - k_{D^*}^{z_2} D - V_D^{x_2} \cdot f(D, K_D^{x_2}) - k_D^\phi D$                                                                                                                                                                                                                                        |             |
| $V_{y_1}^{x_1} = 17.7672 \text{ nM s}^{-1}, \quad K_{y_1}^{x_1} = 1.7933 \text{ nM}, \quad V_{c_1}^{x_1, x_2} = 125.3660 \text{ nM s}^{-1}, \quad K_{c_1}^{x_1, x_2} = 56.3667 \text{ nM}, \quad k_{x_1}^{y_1} = 1.3369 \text{ s}^{-1}$<br>$K_{x_1}^{y_1} = 21.5017 \text{ nM}, \quad V_{z_1}^{y_1} = 8.485 \text{ nM s}^{-1}, \quad K_{z_1}^{y_1} = 3.3207 \text{ nM}, \quad k_{y_1}^{z_1} = 1.3369 \text{ s}^{-1}, \quad K_{y_1}^{z_1} = 21.5017 \text{ nM}$<br>$k_{z_1, z_2}^{c_1} = 0.9128 \text{ nM s}^{-1}, \quad k_{c_1}^{z_1, z_2} = 1.7441 \text{ s}^{-1}, \quad k_{c_1}^{c_2} = 0.2352 \text{ nM s}^{-1}, \quad k_{c_2}^{c_1} = 14.6428 \text{ s}^{-1}, \quad R_0 = 8.1524 \times 10^{-4} \text{ nM s}^{-1}$<br>$k_{c_2}^{pre\text{mRNA}} = 0.4267 \text{ s}^{-1}, \quad k_{pre\text{mRNA}}^{mRNA} = 0.6621 \text{ s}^{-1}, \quad k_{mRNA}^\phi = 0.068 \text{ s}^{-1}, \quad k_{mRNA}^p = 59.9722 \text{ s}^{-1}$<br>$k_{cyt}^n = 2.5531 \text{ s}^{-1}, \quad V_{y_2}^{x_2} = 69.5154 \text{ nM s}^{-1}, \quad K_{y_2}^{x_2} = 112.334 \text{ nM}, \quad V_D^{x_2, x_2^*} = 55.9578 \text{ nM s}^{-1}, \quad K_D^{x_2, x_2^*} = 8.947 \text{ nM}$<br>$k_{x_2}^{y_2} = 6.5615 \text{ nM s}^{-1}, \quad K_{y_2}^{x_2} = 27.1651 \text{ nM}, \quad k_{x_2}^\phi = 0.0214 \text{ s}^{-1}, \quad k_{y_2}^{z_2} = 1.3943 \text{ s}^{-1}, \quad K_{y_2}^{z_2} = 2.069 \text{ nM}$<br>$V_{z_2}^{y_2} = 11.9303 \text{ nM s}^{-1}, \quad K_{z_2}^{y_2} = 110.6230 \text{ nM}, \quad k_{z_2, z_2^*}^{D^*} = 0.2867 \text{ nM s}^{-1}, \quad k_{D^*}^{z_2, z_2^*} = 1.2753 \text{ s}^{-1}, \quad k_{z_2}^\phi = 0.00090396 \text{ s}^{-1}$<br>$k_{y_2}^{z_2} = 0.0053 \text{ s}^{-1}, \quad k_D^\phi = 0.0498 \text{ s}^{-1}, \quad V_D^{x_2} = 105.164 \text{ nM s}^{-1}, \quad K_D^{x_2} = 60.7342 \text{ nM}, \quad k_{z_2}^D = 0.0546 \text{ nM s}^{-1}, \quad k_D^{z_2} = 428.219 \text{ s}^{-1}$ |                                                                                                                                                                                                                                                                                                                                       |             |
| $f(x, K) = \frac{x}{K+x}, f_s = f_s(\alpha, \tau, t), X_2^* = \text{c-FOS}, Z_2^* = \text{ppc-FOS}, D^* = \text{ppc-FOS:ppc-JUN}, V_c = \text{cell volume}, V_n = \text{nucleus volume}$                                                                                                                                                                                                                                                                                                                                                                                                                                                                                                                                                                                                                                                                                                                                                                                                                                                                                                                                                                                                                                                                                                                                                                                                                                                                                                                                                                                                                                                                                                                                                                                                                                                                                                                |                                                                                                                                                                                                                                                                                                                                       |             |

<sup>1</sup> Miller GM, Ogunnaike BA, Schwaber JS, Vadigepalli R (2010) Robust dynamic balance of AP-1 transcription factors in a neuronal gene regulatory network. BMC Systems Biology 4: 171.
