# Supplementary material for: Intracellular Information Processing through Encoding and Decoding of Dynamic Signaling Features
Source: PubMed Central journal article supplement (PMC4619640; doi:10.1371/journal.pcbi.1004563), 2015-10-22

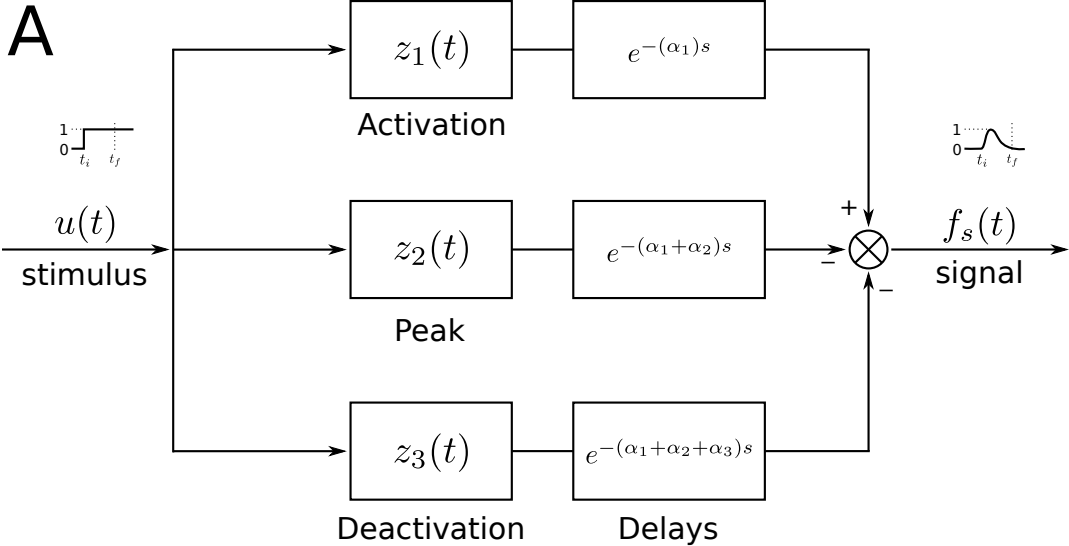

**B**

Pairwise Distributions between signaling features to confirm independent sampling

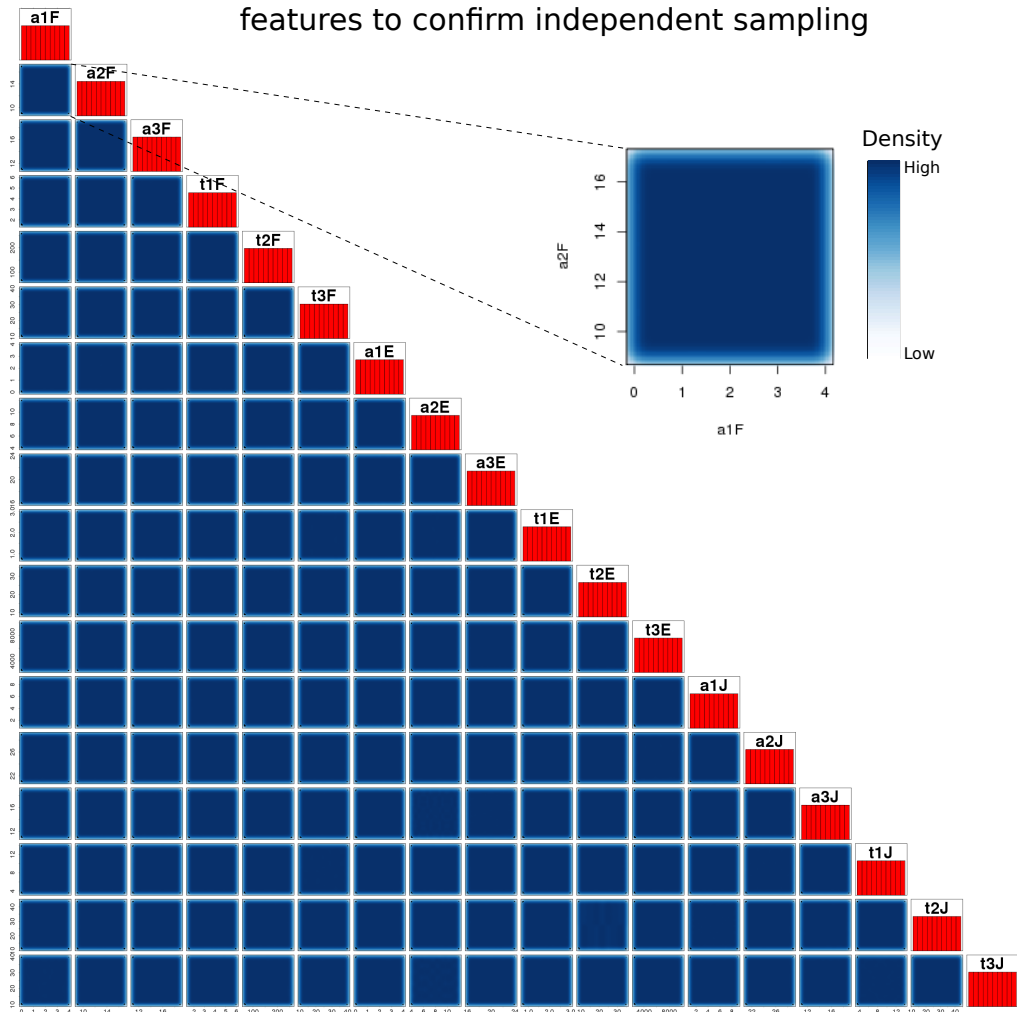

Supplement: pcbi.1004563.s003.pdf [file pcbi.1004563.s003.pdf]
