# Supplementary material for: Intracellular Information Processing through Encoding and Decoding of Dynamic Signaling Features
Source: PubMed Central journal article supplement (PMC4619640; doi:10.1371/journal.pcbi.1004563), 2015-10-22
Supplement: pcbi.1004563.s005.pdf [file pcbi.1004563.s005.pdf]

**A**

ppc-FOS:ppcJUN

ppc-JUN:ppcJUN

Total AP-1

**B**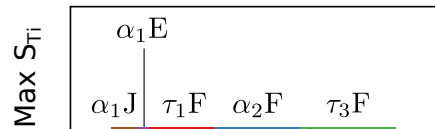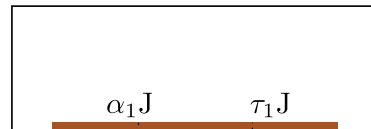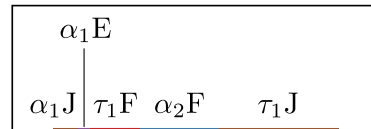

Signaling features

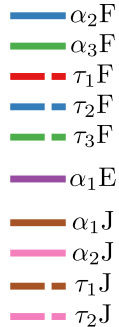Total Sensitivity ( $S_{Ti}$ )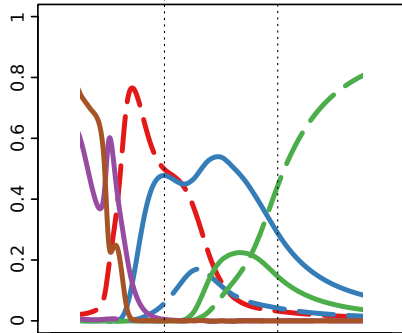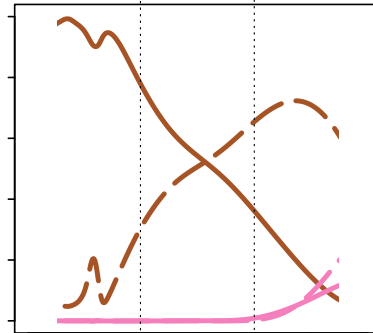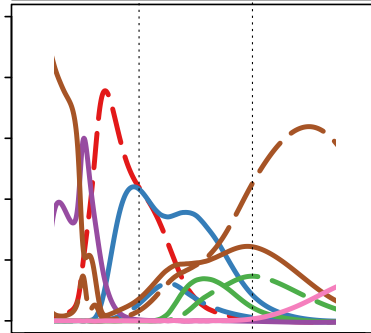Higher Order Sensitivity ( $S_{Ti} - S_i$ )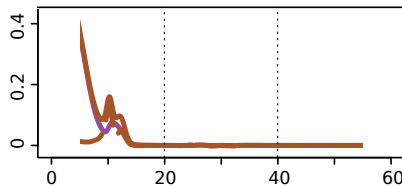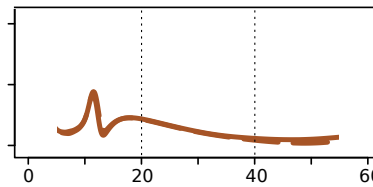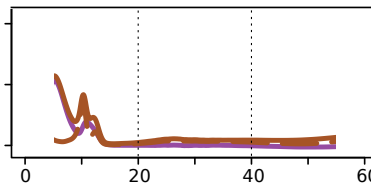

Time (min)
