# Supplementary material for: Intracellular Information Processing through Encoding and Decoding of Dynamic Signaling Features
Source: PubMed Central journal article supplement (PMC4619640; doi:10.1371/journal.pcbi.1004563), 2015-10-22

**A Total AP-1**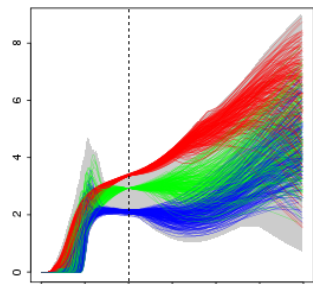**E ppc-FOS:ppc-JUN**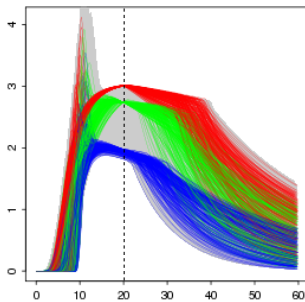**I ppc-JUN:ppc-JUN**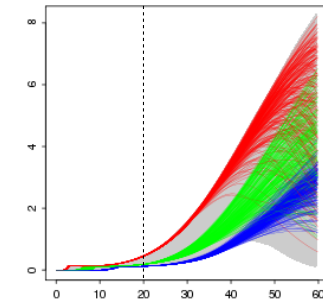**B FRK ERK JNK**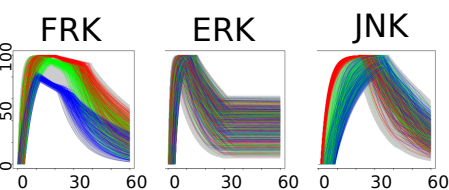**F FRK ERK JNK**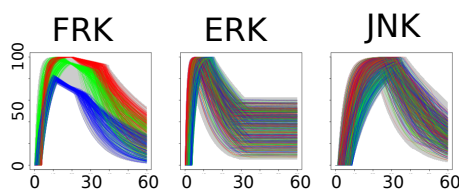**J FRK ERK JNK**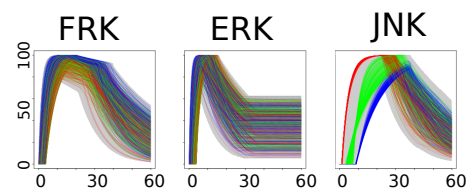**C**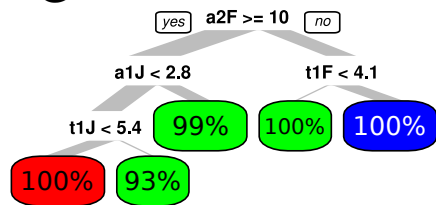**G**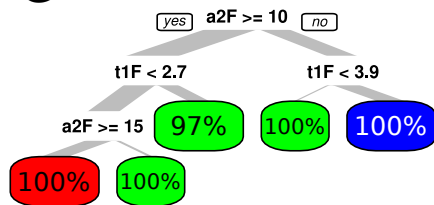**K**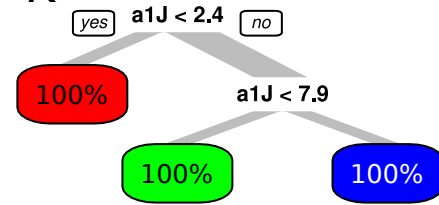**D**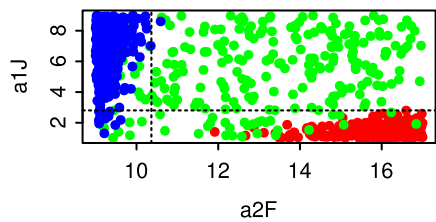**H**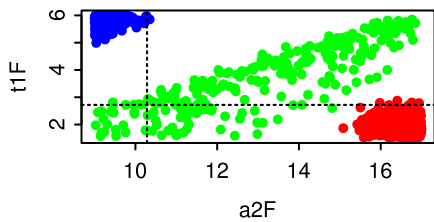**L**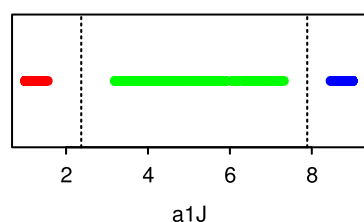

Supplement: pcbi.1004563.s007.pdf [file pcbi.1004563.s007.pdf]
